# Supplementary material for: Accelerated Endothelialization of Nanofibrous Scaffolds for Biomimetic Cardiovascular Implants
Source: MDPI journal article supplement (doi:10.3390/ma15062014), 2022-03-09
Supplement: s1 [file s1]

# Accelerated Endothelialization of Nanofibrous Scaffolds for Biomimetic Cardiovascular Implants

Claudia Matschegewski <sup>1</sup>, Stefanie Kohse <sup>2</sup>, Jana Markhoff <sup>2</sup>, Michael Teske <sup>2</sup>, Katharina Wulf <sup>2</sup>, Niels Grabow <sup>2</sup>, Klaus-Peter Schmitz <sup>1,2</sup> and Sabine Illner <sup>2,\*</sup>

<sup>1</sup> Institute for ImplantTechnology and Biomaterials e.V., Friedrich-Barnewitz-Straße 4, 18119 Rostock, Germany; claudia.matschegewski@uni-rostock.de, schmitz@iib-ev.de

<sup>2</sup> Institute for Biomedical Engineering, Rostock University Medical Center, Friedrich-Barnewitz-Straße 4, 18119 Rostock, Germany; jana.markhoff@uni-rostock.de; stefaniekohse@web.de; michael.teske@uni-rostock.de; katharina.wulf@uni-rostock.de; niels.grabow@uni-rostock.de

\* Correspondence: sabine.illner@uni-rostock.de; Tel.: +49-381-54345-521

## Section 1. Introduction

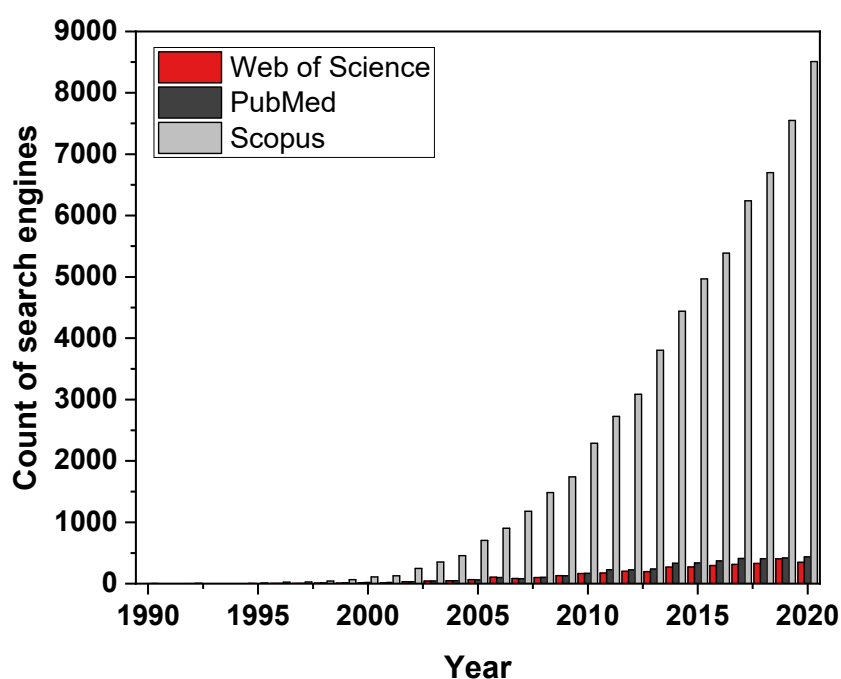

**Figure S1:** The annual number of publications for the last 20 years with topic “engineer\* cardi\* scaffold\*” provided by the search engine of Scopus, PubMed and Web of Science before the 15<sup>th</sup> February, 2022.

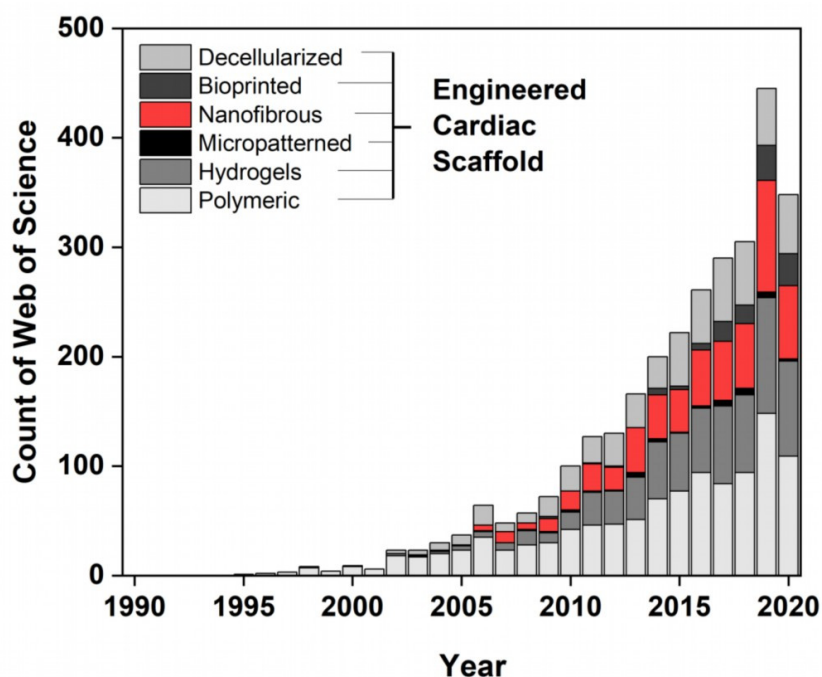

**Figure S2:** The annual number of publications for the last 20 years with topic “engineer\* cardi\* scaffold\*” associated with supplementary search terms: “polymer\*”, “hydrogel\*”, “micropattern\*”, “nanofib\*”, “bioprint\*” or “decellular\*”, provided by the search engine of Web of Science before 15<sup>th</sup> February 2022.

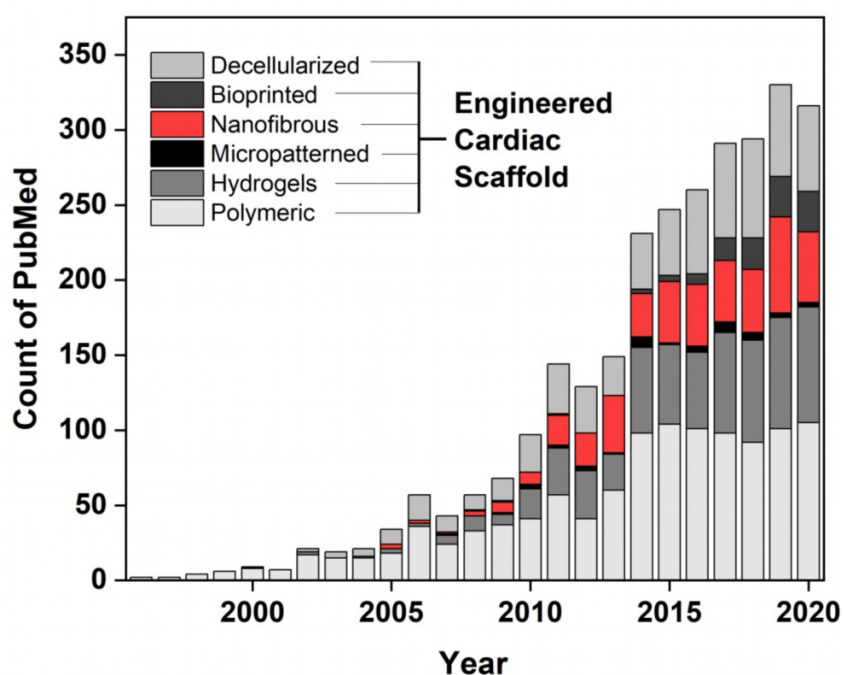

**Figure S3:** The annual number of publications for the last 20 years with topic “engineer\* cardi\* scaffold\*” associated with supplementary search terms: “polymer\*”, “hydrogel\*”, “micropattern\*”, “nanofib\*”, “bioprint\*” or “decellular\*”, provided by the search engine of PubMed before before 15th February 2022.

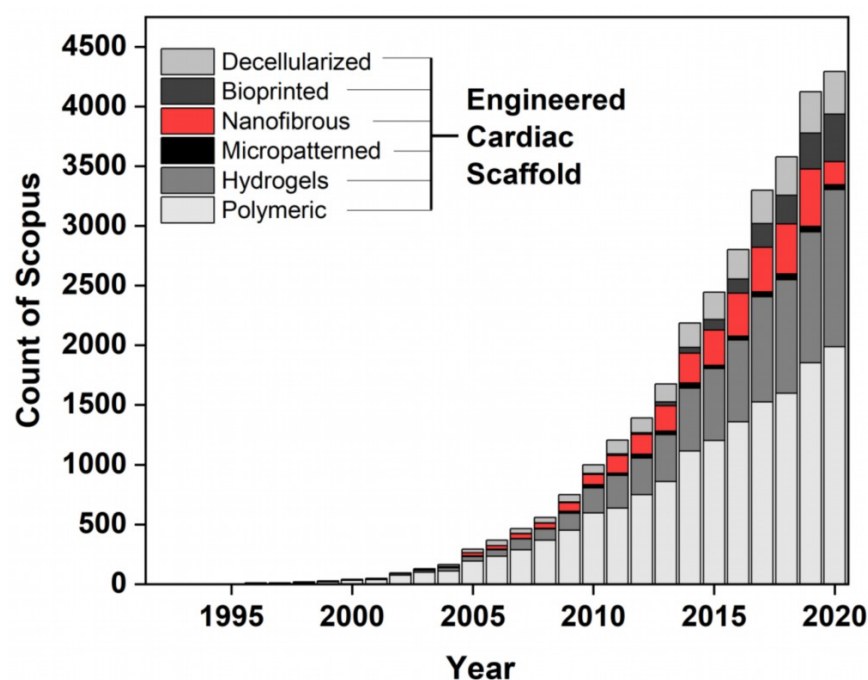

**Figure S4:** The annual number of publications for the last 20 years with topic “engineer\* cardi\* scaffold\*” associated with supplementary search terms: “polymer\*”, “hydrogel\*”, “micropattern\*”, “nanofib\*”, “bioprint\*” or “decellular\*”, provided by the search engine of Scopus before 15th February 2022.

### Section 3.1. Morphology of polymeric nonwovens

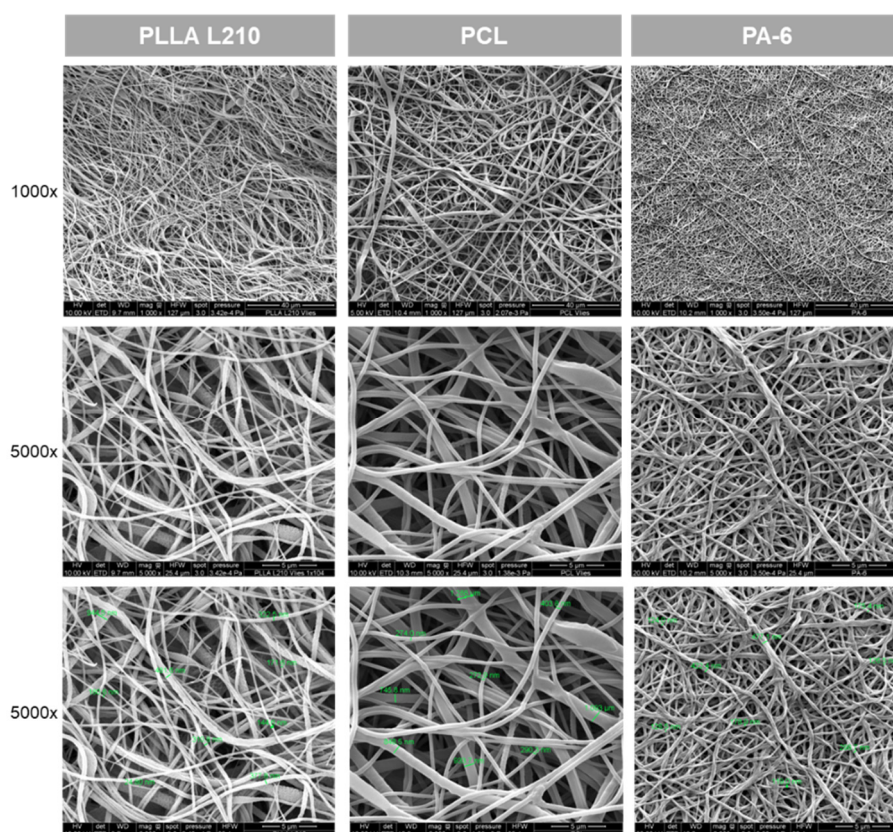

**Figure S5:** Representative SEM images of PLLA L210, PCL and PA-6 nonwovens at magnification 1000x and 5000x.

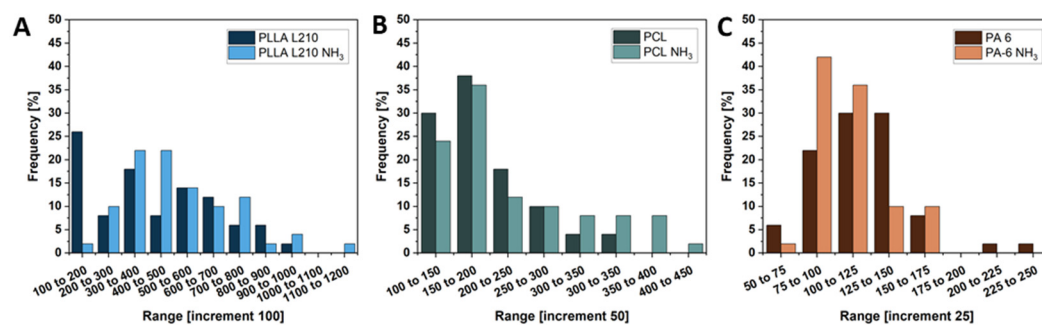

**Figure S6:** Frequency of the respective fiber diameters within the individually defined increments for untreated and activated (A) PLLA L210, (B) PCL and (C) PA-6 nonwovens based on 50 individual measurement points (where for each polymer 10 fibers were measured manually in 5 SEM images).

### Section 3.6. Endothelial actin cytoskeleton formation on polymeric nonwovens

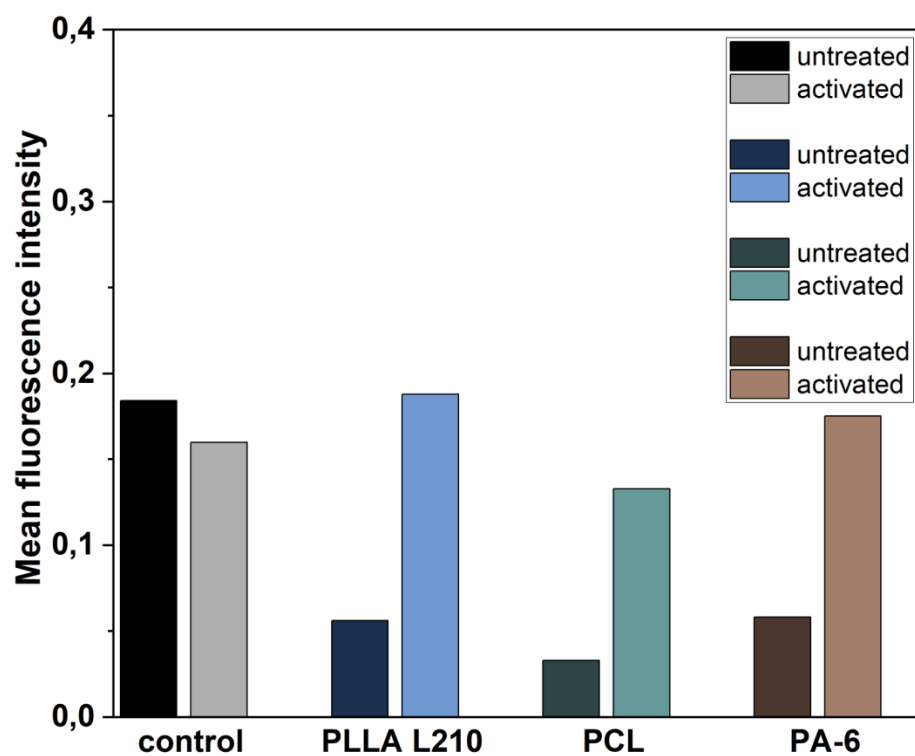

**Figure S7.** Fluorescence intensity of F-actin formation (phalloidin-TRITC for F-actin) in human endothelial EA.hy926 cells grown for 48 h on untreated and NH<sub>3</sub>-plasma functionalized polymeric nonwovens and polystyrene control surface (n = 1).

### Section 3.7. Expression of endothelial cell-specific PECAM-1 marker

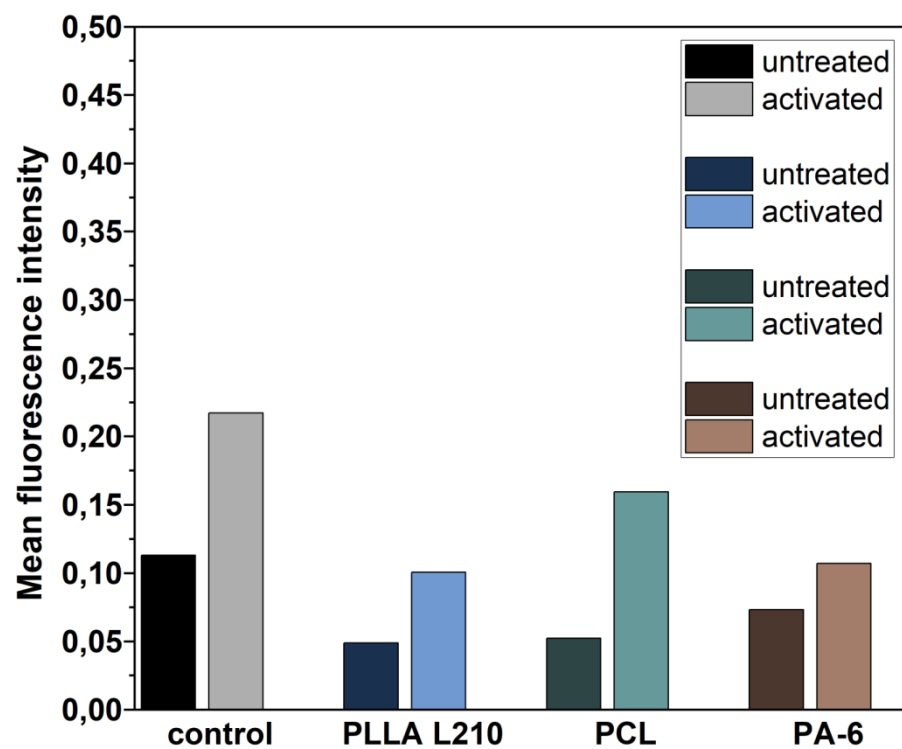

**Figure S8.** Mean fluorescence intensity of CD 31 expression by human endothelial EA.hy926 cells grown for 48 h on untreated and NH<sub>3</sub>-plasma functionalized polymeric nonwovens (n = 1).
